# Supplementary material for: Large-Scale Analysis Reveals Racial Disparities in the Prevalence of ADHD and Conduct Disorders
Source: bioRxiv or medRxiv preprint supplement (doi:10.1101/2023.10.25.23297549), 2023-10-25
Supplement: Supplementary file [file media-1.pdf]

**Figure S1:** Line plot of the trend of **A.** ADHD diagnosis, and **B.** CD diagnosis between 2000 and 2022 in Black and White patients.

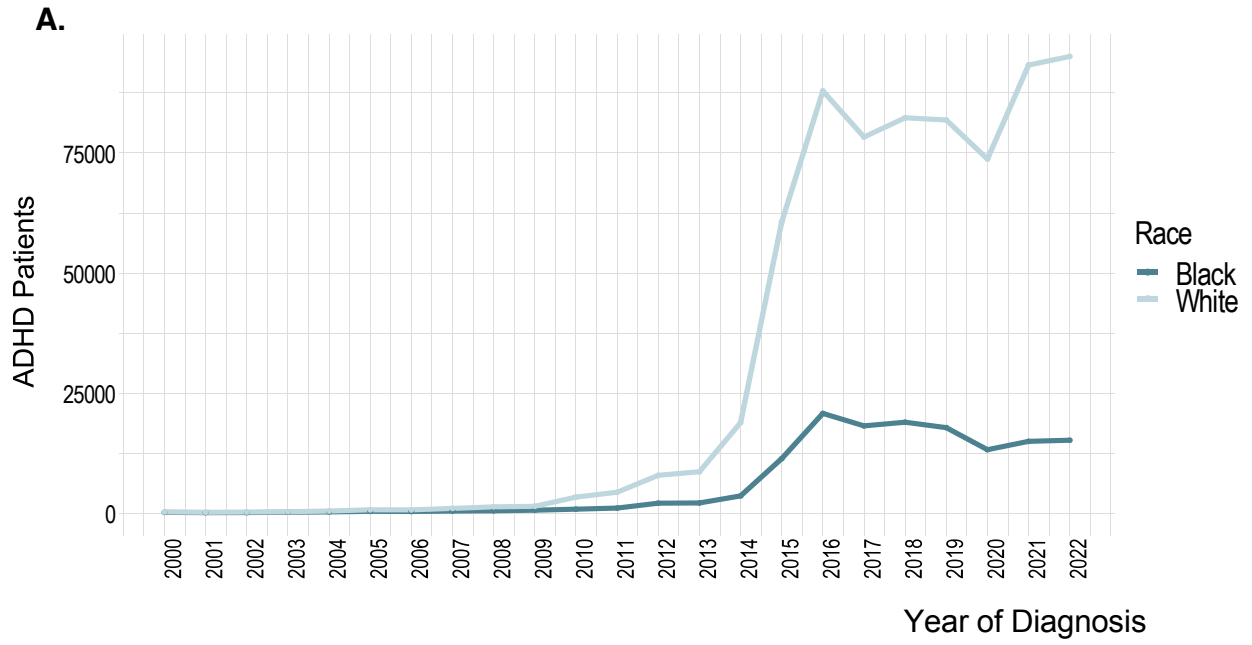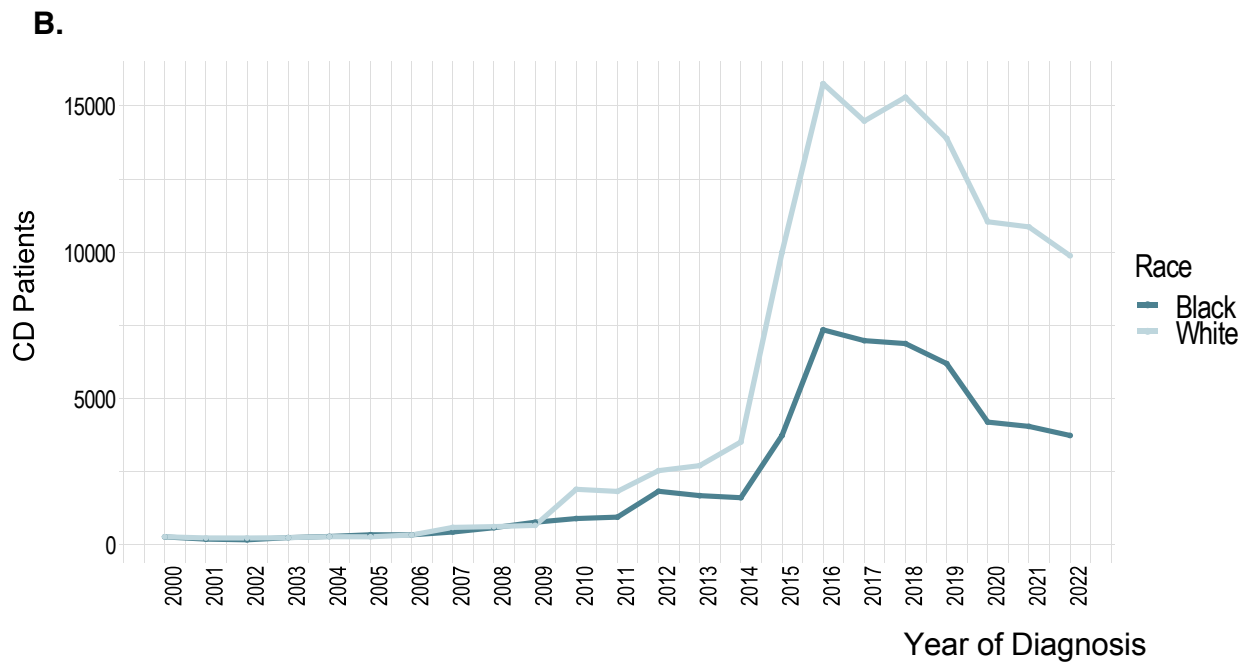

**Figure S2: A.** Incidence of ADHD and CD in Black and White populations. **B.** Normalized incidence of ADHD and CD in Black and White populations.

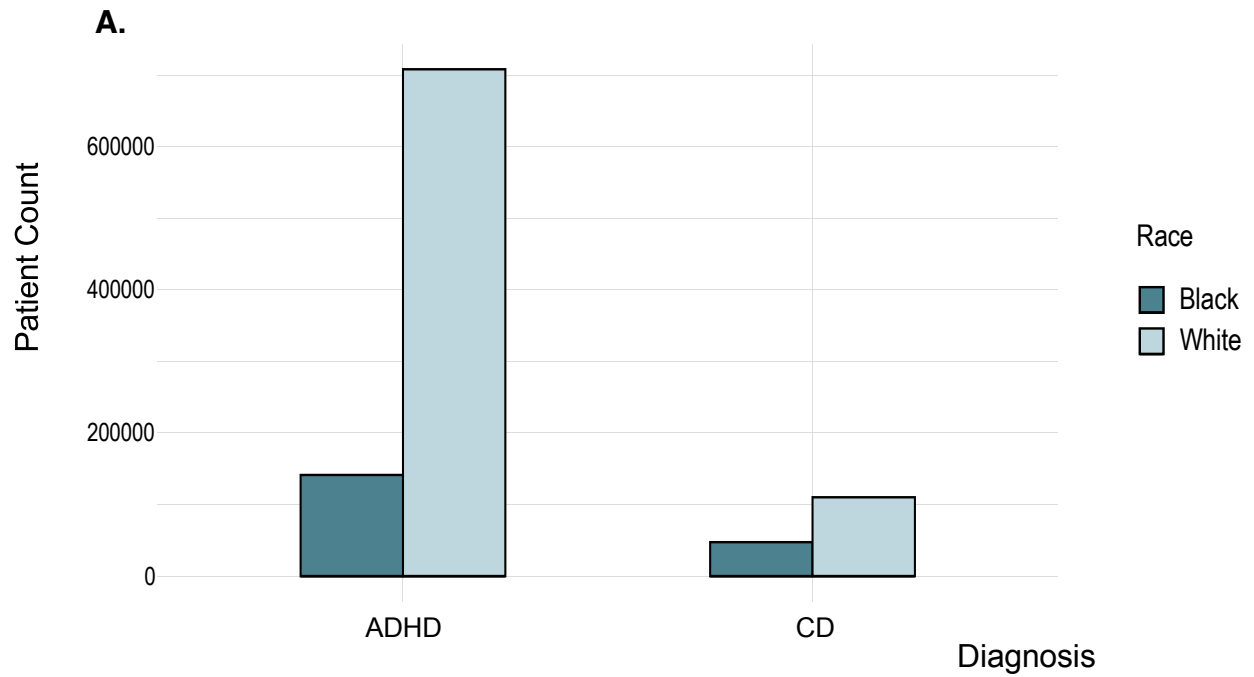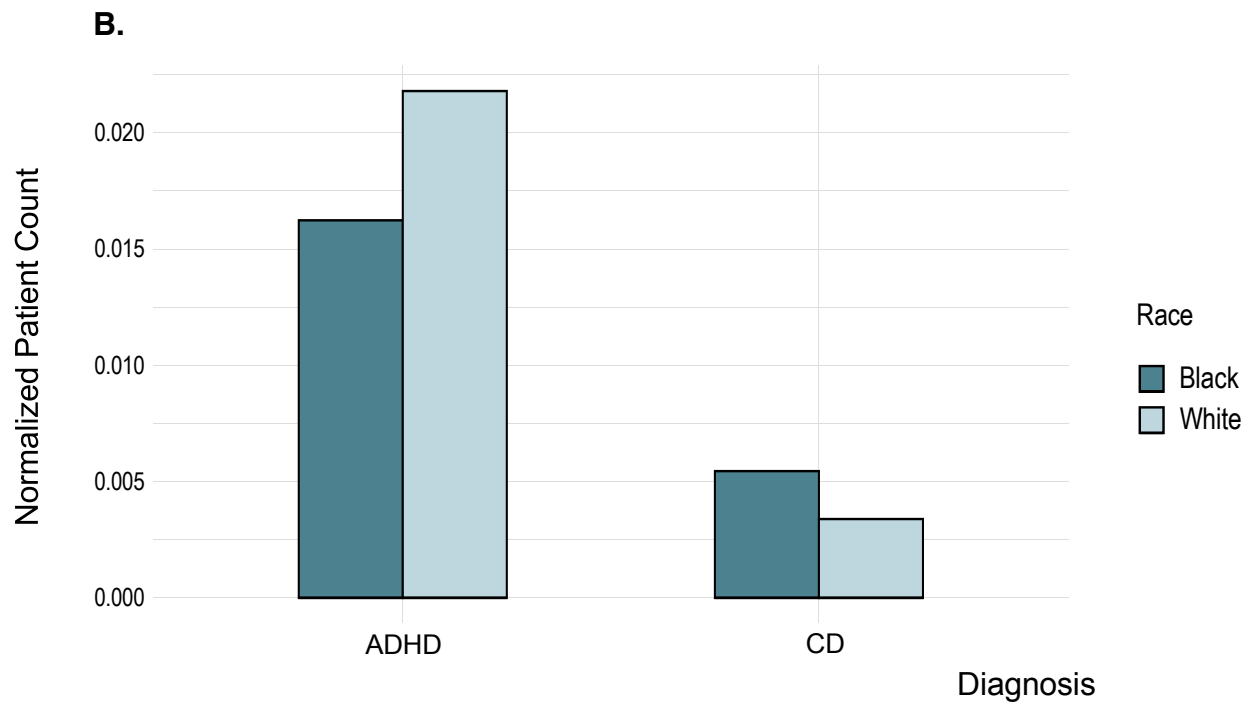

**Figure S3: A.** Incidence of ADHD, **B.** Normalized incidence of ADHD, **C.** Incidence of CD, and **D.** Normalized incidence of CD in Black Male, Black Female, White Male, and White Female populations.

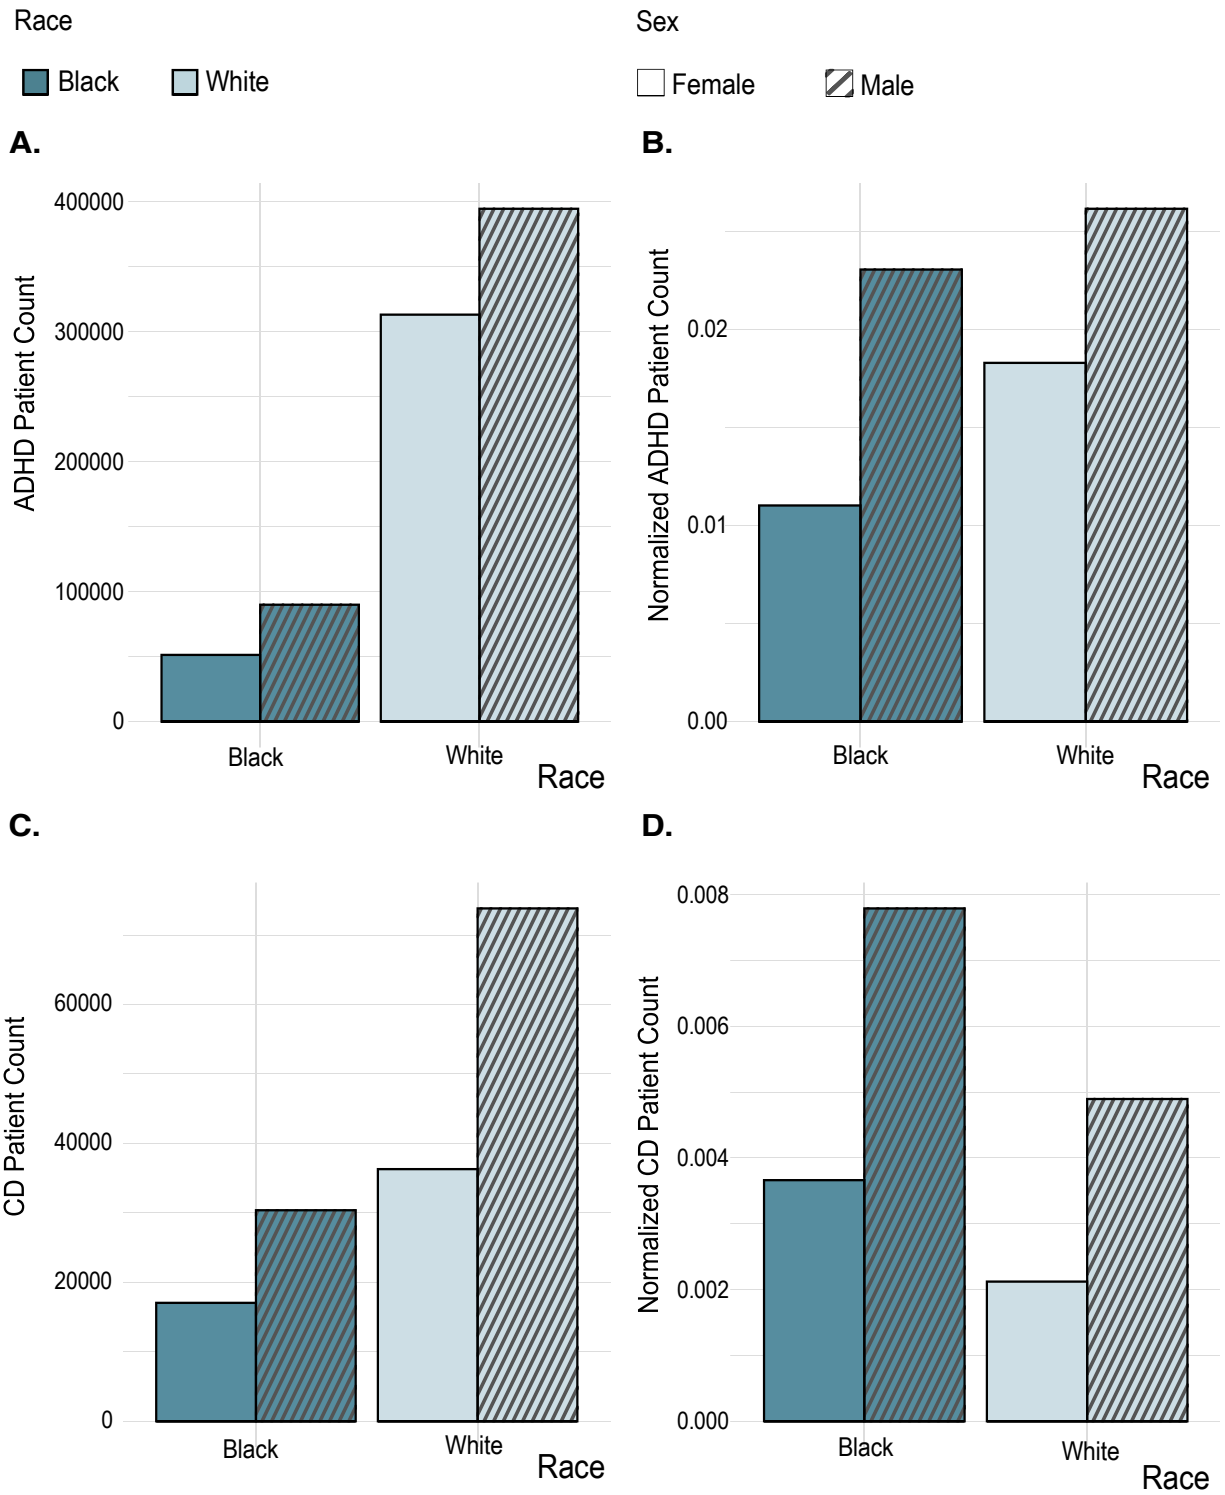

**Figure S4:** Linear Regression line plots show the linear correlation between Black and White patients; **A.** across all the ages of diagnosis of ADHD patients, **B.** in ADHD patients 18 years old and younger, and **C.** across all the ages of diagnosis of CD patients.

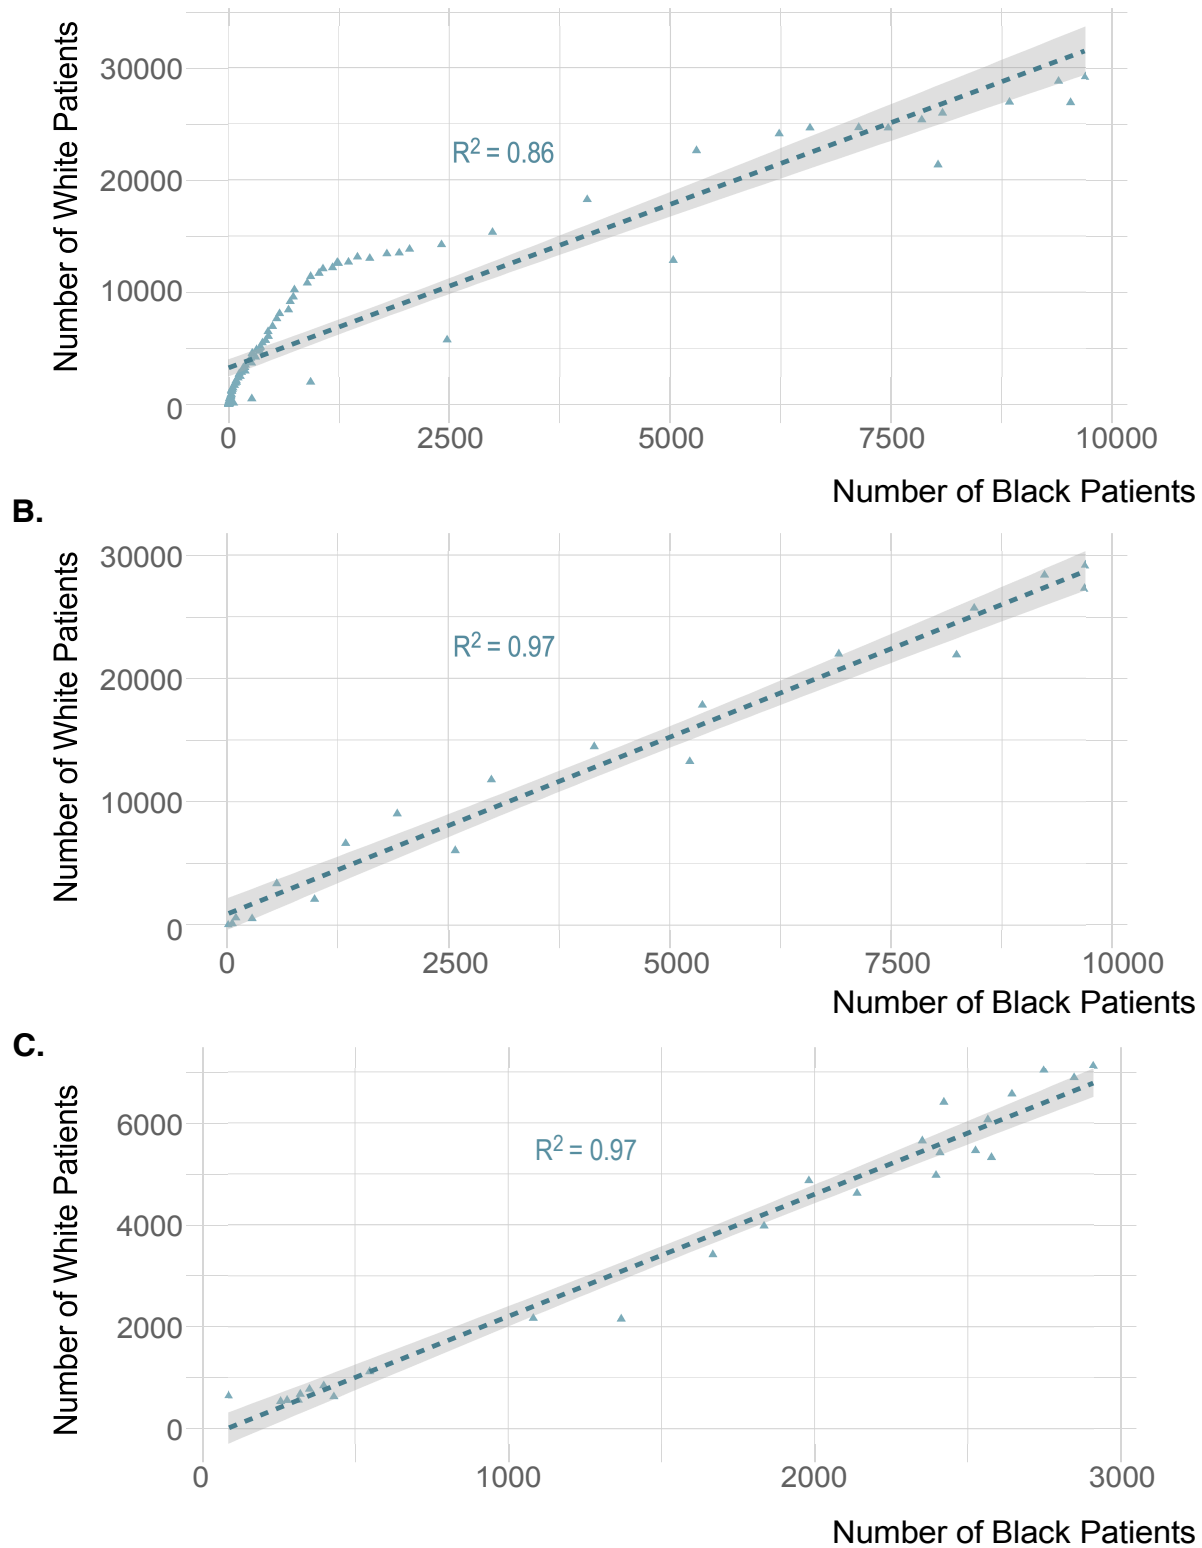

**Figure S5:** Odds Ratio and 95% confidence interval of the incidence of ADHD and CD and their presentations in **A.** the Black male population, **B.** the White female population, and **C.** the Black female population, all compared to the White male population.

**A. Black Male compared to White Male**

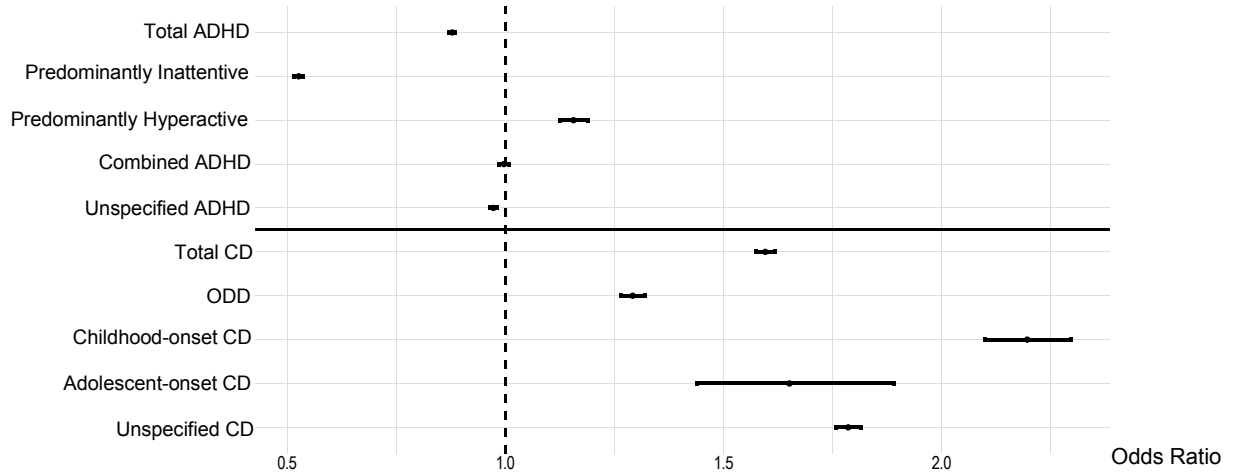

**B. White Female compared to White Male**

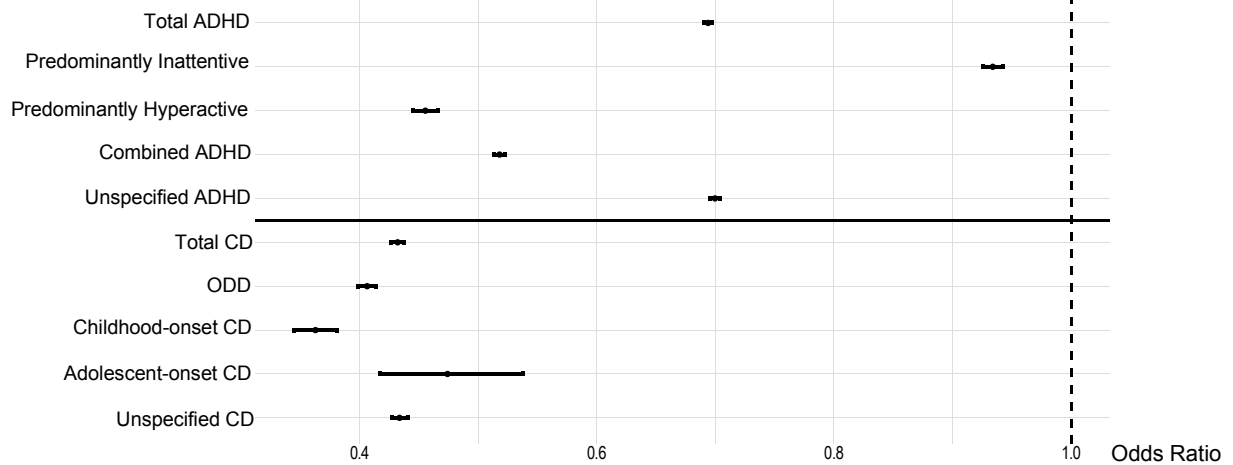

**C. Black Female compared to White Male**

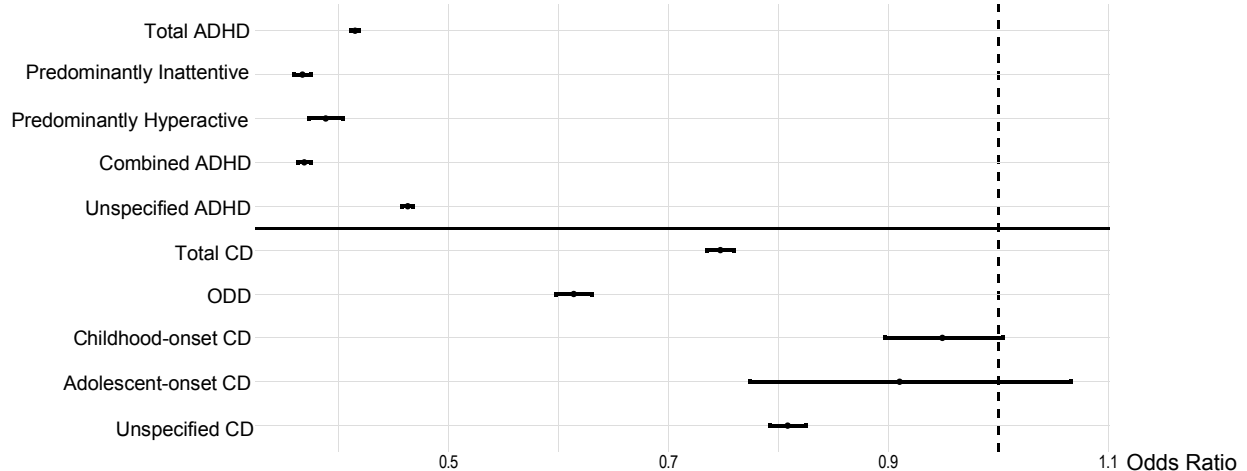

**Table S1:** Race and sex distribution of the patient population

|                        | Number of patients in group | %    | Number of ADHD patients | %    | Number of CD patients | %    |
|------------------------|-----------------------------|------|-------------------------|------|-----------------------|------|
| Race                   |                             |      |                         |      |                       |      |
| Black/African American | 8,702,848                   | 21.1 | 141,277                 | 1.62 | 47,437                | 0.55 |
| Sex                    |                             |      |                         |      |                       |      |
| Female                 | 4,654,839                   | 53.5 | 51,323                  | 36.3 | 17,047                | 35.9 |
| Male                   | 3,899,810                   | 44.8 | 89,935                  | 63.7 | 30,381                | 64.0 |
| White                  | 32,489,776                  | 78.9 | 708,004                 | 2.18 | 110,160               | 0.34 |
| Sex                    |                             |      |                         |      |                       |      |
| Female                 | 17,111,169                  | 52.7 | 313,138                 | 44.2 | 36,300                | 33.0 |
| Male                   | 15,083,418                  | 46.4 | 394,607                 | 55.7 | 73,837                | 67.0 |

**Table S2:** Statistical differences in the ages of first diagnosis of ADHD and CD between black and white patients

|                 | Black  | White   | R <sup>2</sup> | p-value |
|-----------------|--------|---------|----------------|---------|
| ADHD            |        |         |                |         |
| Mean            | 15.7   | 23.9    | 0.86           | <0.0001 |
| Range           | 1 - 88 | 1 - 108 |                |         |
| ADHD (Children) |        |         |                |         |
| Mean            | 9.00   | 9.51    | 0.97           | <0.0001 |
| Range           | 1 - 18 | 1 - 18  |                |         |
| CD              |        |         |                |         |
| Mean            | 10.5   | 10.3    | 0.97           | <0.0001 |
| Range           | 1 - 25 | 1 - 25  |                |         |

**Table S3:** ADHD and CD Pearson's Chi-squared test

|      |        | Black  | White   | $\chi^2$ | p-value |
|------|--------|--------|---------|----------|---------|
| ADHD |        |        |         |          |         |
|      | Female | 51,323 | 313,138 | 3008.5   | <0.0001 |
|      | Male   | 89,935 | 394,607 |          |         |
| CD   |        |        |         |          |         |
|      | Female | 17,047 | 36,300  | 131.81   | <0.0001 |
|      | Male   | 30,381 | 73,837  |          |         |
